# Supplementary material
Source: Springer Nature journal article supplement (https://www.springermedizin.de/resource/supplementary/12885_2007_943_MOESM2_ESM.pdf/9471842)
Supplement: MOESM2 [file 9471842]

**Evaluation of possible interaction between tumour origin and resection margin status**

**A. Analysis including all four tumour origins (ampulla, duodenum, distal bile duct, pancreas) and resection margin status (free vs involved) (n=114)**

|                                              | df                     | p-value | HR               | 95.0% CI for HR |       |
|----------------------------------------------|------------------------|---------|------------------|-----------------|-------|
|                                              |                        |         |                  | Lower           | Upper |
| Covariates (assuming no interaction)         |                        |         |                  |                 |       |
| R-status                                     | 1                      | 0.000   | 2.61             | 1.59            | 4.27  |
| Origin                                       | 3                      | 0.002   |                  |                 |       |
| Origin(duodenum vs ampulla)                  | 1                      | 0.699   | 1.17             | 0.54            | 2.54  |
| Origin(distal bile duct vs ampulla)          | 1                      | 0.652   | 0.84             | 0.40            | 1.78  |
| Origin(pancreas vs ampulla)                  | 1                      | 0.002   | 2.50             | 1.41            | 4.44  |
| -2 Log Likelihood of model coefficients      | 607.31                 | 4       |                  |                 |       |
| Covariates (assuming interaction)            |                        |         |                  |                 |       |
| R-status                                     | 1                      | 0.000   | 6.03             | 2.51            | 14.48 |
| Origin                                       | 3                      | 0.000   |                  |                 |       |
| Origin(duodenum vs ampulla)                  | 1                      | 0.387   | 1.51             | 0.59            | 3.84  |
| Origin(distal bile duct vs ampulla)          | 1                      | 0.972   | 0.98             | 0.28            | 3.47  |
| Origin(pancreas vs ampulla)                  | 1                      | 0.000   | 4.72             | 2.19            | 10.20 |
| Origin*R-status                              | 3                      | 0.103   |                  |                 |       |
| Origin(duodenum vs ampulla)*R-status         | 1                      | 0.493   | 0.54             | 0.09            | 3.19  |
| Origin(distal bile duct vs ampulla)*R-status | 1                      | 0.437   | 0.53             | 0.11            | 2.61  |
| Origin(pancreas vs ampulla)*R-status         | 1                      | 0.014   | 0.25             | 0.08            | 0.75  |
| -2 Log Likelihood of model coefficients      | 601.24                 | 7       |                  |                 |       |
| Change in Chi-square                         | 607.31 - 601.24 = 6.07 | 3       | 0.10 < p < 0.20* |                 |       |

**B. Analysis including the two largest groups of tumour origin (ampulla, pancreas) and resection margin status (free vs involved) (n=81)**

|                 | df | p-value | HR   | 95.0% CI for HR |       |
|-----------------|----|---------|------|-----------------|-------|
|                 |    |         |      | Lower           | Upper |
| R-status        | 1  | 0.000   | 7.21 | 2.74            | 18.97 |
| Origin          | 1  | 0.000   | 5.81 | 2.43            | 13.89 |
| Origin*R-status | 1  | 0.009†  | 0.20 | 0.06            | 0.67  |

\* non-significant

† significant
